# Supplementary material for: Maternal Low-Protein Diet or Hypercholesterolemia Reduces Circulating Essential Amino Acids and Leads to Intrauterine Growth Restriction
Source: Oxford University Press journal article supplement (doi:10.2337/db07-1530), 2008-12-11
Supplement: db07-15301_suppl.xls [file db07-15301_suppl.xls]

## Sheet: 71
No.	Peakname	Ret.Time	Area	Amount	Type	Height	Rel.Area
		min	AU*min	µmol/L		AU	%
1	PSER	2.42	0.0018	13.705	BM	0.005	0.33
2	TAU	3.42	0.0436	421.631	M	0.192	8.19
3	PETN	4.02	0.0015	22.5928	MB^	0.004	0.29
4	Urea	5.127	0.0168	5133.05	BMB	0.069	3.16
5	ASP	9.513	0.0009	8.136	BMB*	0.001	0.18
6	THR	12.98	0.0161	129.086	BM ^	0.055	3.03
7	SER	13.64	0.0172	137.06	M *^	0.046	3.23
8	ASN	15.04	0.0036	38.8552	M ^	0.007	0.67
9	GLU	16.26	0.0045	34.0948	M *^	0.013	0.85
10	GLN	16.867	0.0645	536.515	MB*^	0.104	12.12
12	GLY	26.34	0.0281	224.411	MB*	0.051	5.27
14	ALA	27.687	0.0296	224.352	M *^	0.06	5.56
15	CIT	28.353	0.0091	67.1476	MB*^	0.02	1.71
17	ABU	29.507	0.001	7.7519	MB*	0.002	0.19
18	VAL	30.807	0.019	146.116	BMB*	0.038	3.57
19	MET	35.507	0.0048	43.646	BMB	0.008	0.9
20	ILE	37.773	0.0087	66.4483	BM *^	0.014	1.62
21	LEU	39.307	0.0145	117.493	MB*	0.021	2.72
22	TYR	43.14	0.0091	69.0392	BM	0.009	1.7
23	PHE	45.84	0.0065	51.2466	MB	0.007	1.23
24	TRYP	71.713	0.0034	46.0507	BMB*	0.002	0.64
25	Ammonia	82.513	0.0301	143.24	BMB	0.015	5.64
27	ORN	88.447	0.0144	85.5379	BMB^	0.013	2.71
28	LYS	91.64	0.0224	159.89	BMB	0.02	4.21
29	HIS	96.067	0.0067	50.9766	BMB^	0.017	1.25
30	3-MHIS	97.573	0.0009	6.7929	BMB	0.003	0.16
31	1-MHIS	98.74	0.0002	2.0756	BMB	0.001	0.04
32	AGPA	106.787	0.1461	313.422	BMB*	0.464	27.44
33	ARG	120.507	0.0062	50.3373	BMB*	0.009	1.17
Total:			0.5314	8350.7		1.27	99.78

## Sheet: 72
No.	Peakname	Ret.Time	Area	Amount	Type	Height	Rel.Area
		min	AU*min	µmol/L		AU	%
1	PSER	2.467	0.0007	5.4772	BMB*	0.003	0.2
2	TAU	3.44	0.017	172.49	BMB	0.072	4.97
3	PETN	4.153	0.0004	6.7431	BMB^	0.001	0.13
4	Urea	5.16	0.0132	4199.59	BMB	0.054	3.84
5	THR	13.44	0.0085	71.1733	BM ^	0.043	2.48
6	SER	13.887	0.0071	59.3876	MB^	0.022	2.08
7	ASN	15.22	0.0011	12.6418	BMB^	0.003	0.32
8	GLU	16.44	0.0025	19.3839	BM *^	0.006	0.72
9	GLN	17.033	0.0334	290.265	MB*^	0.057	9.73
11	GLY	26.42	0.0125	104.537	M *	0.024	3.64
12	ALA	27.76	0.0117	92.5172	M *^	0.024	3.4
13	CIT	28.46	0.0061	47.361	MB^	0.013	1.79
14	ABU	29.62	0.0004	3.6243	BMB^	0.001	0.13
15	VAL	30.893	0.0145	116.415	BMB	0.028	4.21
16	MET	35.56	0.0027	26.1134	BMB	0.005	0.8
17	ILE	37.82	0.0076	60.7736	BM ^	0.012	2.2
18	LEU	39.36	0.0109	92.5875	MB	0.016	3.17
19	TYR	43.187	0.0043	34.5712	BMB*	0.005	1.26
20	PHE	45.88	0.0043	35.5118	BMB	0.005	1.26
21	TRYP	72.12	0.0042	59.8725	BMB*	0.002	1.23
23	ORN	88.553	0.0134	83.2952	BMB^	0.012	3.91
24	LYS	91.72	0.0113	84.6863	BMB	0.011	3.3
25	HIS	96.12	0.0038	30.4107	BMB*	0.01	1.11
26	3-MHIS	97.66	0.0003	2.7302	BMB	0.001	0.1
27	AGPA	106.8	0.1396	299.482	BMB*	0.441	40.7
Total:			0.3317	6011.64		0.871	96.68

## Sheet: 73
No.	Peakname	Ret.Time	Area	Amount	Type	Height	Rel.Area
		min	AU*min	µmol/L		AU	%
1	PSER	2.44	0.0009	8.2626	BMB*	0.003	0.22
2	TAU	3.433	0.0277	311.244	BMb	0.126	6.69
3	PETN	4.067	0.0003	6.0211	bMB^	0.001	0.08
4	Urea	5.147	0.0238	8419.79	BMB	0.099	5.74
5	THR	13.073	0.0103	95.1544	BM ^	0.038	2.47
6	SER	13.707	0.0096	88.65	MB^	0.026	2.32
7	ASN	15.167	0.0017	21.4881	BMB^	0.004	0.41
8	GLU	16.313	0.0025	21.6355	BM *^	0.008	0.6
9	GLN	16.987	0.0462	446.015	MB*^	0.076	11.15
11	GLY	26.433	0.0178	164.872	M *^	0.036	4.28
12	ALA	27.767	0.015	132.084	M *^	0.031	3.62
13	CIT	28.46	0.0066	56.3573	MB^	0.014	1.59
14	ABU	29.56	0.0004	3.8401	BMB*^	0.001	0.1
15	VAL	30.893	0.0157	140.195	BMB	0.031	3.79
16	MET	35.593	0.003	32.2087	BMB^	0.005	0.73
17	ILE	37.827	0.0078	69.3662	BM ^	0.012	1.88
18	LEU	39.36	0.0137	129.464	MB	0.019	3.31
19	TYR	43.2	0.0058	51.0169	BMB	0.006	1.39
20	PHE	45.893	0.0062	56.1747	BMB	0.006	1.49
21	TRYP	72.033	0.0038	59.3198	BMB*	0.002	0.91
22	Ammonia	82.607	0.0327	180.604	BMB*	0.017	7.88
23	ORN	88.56	0.0139	95.495	BMB	0.013	3.35
24	LYS	91.76	0.014	115.646	BMB	0.013	3.37
25	HIS	96.147	0.0054	48.2978	BMB^	0.014	1.31
26	3-MHIS	97.66	0.0009	8.4404	BMB	0.003	0.23
27	1-MHIS	98.833	0.0006	6.0948	BMB	0.001	0.14
28	AGPA	106.76	0.1259	269.993	BMB*	0.406	30.37
29	ARG	120.527	0.0005	4.7187	BMB*	0.001	0.12
Total:			0.4126	11042.5		1.013	99.53

## Sheet: 74
No.	Peakname	Ret.Time	Area	Amount	Type	Height	Rel.Area
		min	AU*min	µmol/L		AU	%
1	PSER	2.467	0.0011	9.2138	BMB	0.004	0.24
2	TAU	3.453	0.0223	232.23	BM	0.101	4.74
3	PETN	4.067	0.001	16.1137	MB^	0.003	0.21
4	Urea	5.173	0.0151	4959.66	BMB	0.063	3.21
5	THR	13.067	0.0222	191.143	BM ^	0.076	4.72
6	SER	13.7	0.0128	110.144	MB^	0.035	2.73
7	ASN	15.107	0.0018	20.9275	BMB*^	0.004	0.38
8	GLU	16.3	0.0025	20.4369	BM *^	0.008	0.54
9	GLN	16.98	0.0492	441.236	MB*^	0.08	10.47
11	GLY	26.407	0.0074	63.8487	MB*	0.016	1.58
12	ALA	27.753	0.0306	250.672	BM *^	0.064	6.52
13	CIT	28.447	0.0055	43.5303	M *^	0.013	1.17
14	ABU	29.58	0.0013	10.6773	MB*^	0.003	0.27
15	VAL	30.853	0.0138	114.982	BMB	0.027	2.95
16	MET	35.58	0.0048	47.1458	BMB	0.008	1.02
17	ILE	37.82	0.0082	67.9647	BM ^	0.013	1.75
18	LEU	39.353	0.0119	104.599	MB*	0.017	2.54
19	TYR	43.253	0.0045	36.8163	BMB	0.005	0.95
20	PHE	45.953	0.0057	48.5197	BMB	0.006	1.22
21	TRYP	72.22	0.0029	43.0944	BMB*	0.002	0.63
22	Ammonia	82.613	0.0335	172.225	BMB	0.017	7.13
23	ORN	88.473	0.0165	105.279	BMB*	0.015	3.5
24	LYS	91.647	0.0527	406.196	BMB*	0.047	11.23
25	HIS	96.073	0.0039	32.0676	BMB^	0.01	0.83
26	1-MHIS	98.747	0.0001	1.0578	BMB	0.001	0.02
27	AGPA	106.573	0.1354	290.478	BMB*	0.435	28.83
28	ARG	120.42	0.0022	19.2422	BMB*	0.004	0.47
Total:			0.469	7859.5		1.075	99.83

## Sheet: 75
No.	Peakname	Ret.Time	Area	Amount	Type	Height	Rel.Area
		min	AU*min	µmol/L		AU	%
1	PSER	2.4	0.0008	6.2305	BM	0.003	0.17
2	TAU	3.367	0.0283	288.126	M	0.123	6.29
3	PETN	4	0.0007	10.528	MB^	0.002	0.15
4	Urea	5.093	0.0149	4788.29	BMB	0.063	3.32
5	THR	13.22	0.0112	93.9221	BM ^	0.05	2.48
6	SER	13.747	0.0095	79.7546	MB^	0.028	2.12
7	ASN	15.133	0.0019	21.2821	BM ^	0.004	0.41
8	GLU	16.333	0.0034	26.6742	M *^	0.009	0.75
9	GLN	16.973	0.0493	431.365	MB*^	0.082	10.96
11	GLY	26.4	0.016	134.799	MB*	0.033	3.56
12	ALA	27.733	0.0163	130.021	BM ^	0.035	3.62
13	CIT	28.407	0.0074	57.1852	MB^	0.016	1.64
14	ABU	29.533	0.002	16.1468	BMB^	0.005	0.44
15	VAL	30.827	0.0174	141.236	BMB	0.035	3.88
16	MET	35.567	0.0037	35.8437	BMB*	0.006	0.83
17	ILE	37.767	0.008	64.8837	BM ^	0.013	1.78
18	LEU	39.327	0.0136	116.342	MB	0.02	3.02
19	TYR	43.167	0.0053	42.6323	BMB	0.006	1.18
20	PHE	45.867	0.0056	46.3976	BMB	0.006	1.25
21	TRYP	72.167	0.0048	68.0223	BMB*	0.002	1.06
23	ORN	88.5	0.0156	97.238	BMB^	0.014	3.46
24	LYS	91.7	0.0228	171.633	BMB	0.021	5.08
25	HIS	96.067	0.0066	52.8713	BMB^	0.017	1.46
26	3-MHIS	97.607	0.0004	2.9439	BMB	0.001	0.08
27	AGPA	106.707	0.1389	297.881	BMB*	0.441	30.87
28	ARG	120.367	0.0016	13.3646	BMB*	0.002	0.35
Total:			0.4059	7235.62		1.039	90.21

## Sheet: 76
No.	Peakname	Ret.Time	Area	Amount	Type	Height	Rel.Area
		min	AU*min	µmol/L		AU	%
1	PSER	2.393	0.001	8.1818	BM	0.003	0.22
2	TAU	3.393	0.0378	405.08	M	0.17	8.82
3	PETN	4.013	0.001	17.157	MB^	0.003	0.24
4	Urea	5.113	0.0231	7821.43	BMB	0.097	5.4
5	THR	13.147	0.0091	80.2864	BM ^	0.037	2.12
6	SER	13.727	0.0074	65.6883	MB^	0.021	1.74
7	ASN	15.14	0.0016	19.6803	BM *^	0.003	0.38
8	GLU	16.36	0.0038	31.5732	M *^	0.01	0.89
9	GLN	17.007	0.049	451.143	MB*^	0.081	11.43
11	GLY	26.46	0.0213	188.774	MB*^	0.042	4.97
12	ALA	27.8	0.0136	113.911	BM *^	0.029	3.16
13	CIT	28.513	0.0043	35.27	MB*^	0.01	1.01
14	ABU	29.647	0.0008	6.5529	BMB*^	0.002	0.18
15	VAL	30.913	0.0239	203.413	BMB^	0.048	5.57
16	MET	35.607	0.0028	28.5799	BMB^	0.005	0.66
17	ILE	37.853	0.011	93.7923	BMB^	0.018	2.57
18	LEU	39.407	0.019	171.034	BMB	0.028	4.43
19	TYR	43.207	0.0044	37.2307	BMB	0.005	1.03
20	PHE	45.907	0.0062	53.7841	BMB	0.007	1.44
21	TRYP	72.147	0.0036	53.422	BMB*	0.002	0.83
23	ORN	88.507	0.0093	61.4239	BMB^	0.009	2.18
24	LYS	91.707	0.0121	95.8381	BMB	0.011	2.83
25	HIS	96.12	0.0052	43.9569	BMB	0.013	1.21
26	3-MHIS	97.64	0.0008	7.127	BMB	0.002	0.19
27	1-MHIS	98.78	0.0001	1.259	BMB	0	0.03
28	AGPA	106.607	0.1319	282.827	BMB*	0.426	30.79
29	ARG	120.447	0.0022	20.0364	BMB	0.003	0.52
Total:			0.4063	10398.5		1.084	94.86

## Sheet: 79
No.	Peakname	Ret.Time	Area	Amount	Type	Height	Rel.Area
		min	AU*min	µmol/L		AU	%
1	PSER	2.4	0.0012	9.7698	BMB	0.004	0.24
2	TAU	3.393	0.0299	305.808	BM	0.133	6
3	PETN	4.06	0.0013	19.6433	MB^	0.003	0.25
4	Urea	5.113	0.0176	5660.79	BMB	0.073	3.52
5	THR	13.053	0.0139	117.777	BM ^	0.051	2.79
6	SER	13.687	0.0101	85.2186	MB^	0.028	2.03
7	ASN	15.1	0.0024	27.4029	BMb^	0.005	0.48
8	GLU	16.313	0.0027	21.6727	bM *^	0.009	0.55
9	GLN	17.02	0.0684	600.487	MB*^	0.111	13.7
11	GLY	26.467	0.0215	181.203	M *^	0.043	4.3
12	ALA	27.8	0.017	136.417	M *^	0.036	3.41
13	CIT	28.5	0.0041	31.974	MB*^	0.009	0.82
14	ABU	29.66	0.0016	12.9099	BMB^	0.004	0.31
15	VAL	30.947	0.0263	213.824	BMB^	0.052	5.27
16	MET	35.627	0.0052	50.1242	BMB^	0.009	1.04
17	ILE	37.867	0.0145	117.255	BM *^	0.023	2.9
18	LEU	39.393	0.0236	202.666	MB*	0.034	4.73
19	TYR	43.267	0.005	39.9413	BMB*	0.005	0.99
20	PHE	45.9	0.0076	63.3338	BMB	0.008	1.53
21	TRYP	72.293	0.0038	54.2762	BMB*	0.002	0.76
22	Ammonia	82.593	0.0286	143.819	BMB	0.015	5.73
23	ORN	88.527	0.0145	90.5672	BMB^	0.014	2.9
24	LYS	91.7	0.027	203.682	BMB	0.025	5.41
25	HIS	96.107	0.0068	54.5221	BMB	0.017	1.35
26	3-MHIS	97.6	0.0007	5.4538	BMB	0.002	0.13
27	ANS	101.233	0.0002	4.5652	BMB	0.001	0.05
28	AGPA	106.787	0.1384	296.76	BMB*	0.447	27.72
29	ARG	120.5	0.0039	33.2886	BMB	0.006	0.78
Total:			0.4977	8785.15		1.167	99.71

## Sheet: 80
No.	Peakname	Ret.Time	Area	Amount	Type	Height	Rel.Area
		min	AU*min	µmol/L		AU	%
1	PSER	2.4	0.001	8.4492	BMB	0.003	0.21
2	TAU	3.393	0.0374	396.791	BM	0.168	8
3	PETN	4.06	0.001	17.0763	MB^	0.003	0.22
4	Urea	5.107	0.0283	9471.53	BMB	0.117	6.06
5	THR	13.067	0.0114	99.9904	BM ^	0.042	2.44
6	SER	13.707	0.0098	85.5419	MB^	0.026	2.1
7	ASN	15.14	0.0015	18.317	BMB^	0.004	0.33
8	GLU	16.347	0.0028	23.0919	BM *^	0.008	0.6
9	GLN	17.033	0.0501	457.32	MB*^	0.081	10.73
11	GLY	26.493	0.0272	238.849	Mb*^	0.054	5.83
12	ALA	27.833	0.015	124.967	bM *^	0.031	3.21
13	CIT	28.547	0.0055	44.7695	M *^	0.012	1.19
14	ABU	29.633	0.0016	13.8786	MB*^	0.003	0.35
15	VAL	30.933	0.0261	220.726	BMB^	0.051	5.59
16	MET	35.607	0.0038	37.8735	BMB	0.006	0.81
17	ILE	37.867	0.0117	98.8819	BM ^	0.018	2.51
18	LEU	39.407	0.0196	174.581	MB	0.028	4.19
19	TYR	43.24	0.0041	34.4728	BMB*	0.004	0.88
20	PHE	45.933	0.0063	54.6403	BMB	0.007	1.36
21	TRYP	72.04	0.0039	57.4135	BMB*	0.002	0.82
22	Ammonia	82.6	0.028	146.338	BMB	0.015	5.99
23	ORN	88.533	0.0111	71.9645	BMB^	0.01	2.37
24	LYS	91.767	0.0153	120.172	BMB	0.014	3.28
25	HIS	96.107	0.0059	49.5204	BMB	0.015	1.26
26	3-MHIS	97.627	0.0007	5.7229	BMB	0.002	0.14
27	AGPA	106.527	0.1332	285.697	BMB*	0.421	28.51
28	ARG	120.46	0.0032	28.5283	BMB	0.005	0.69
Total:			0.4658	12387.1		1.152	99.69

## Sheet: 81
No.	Peakname	Ret.Time	Area	Amount	Type	Height	Rel.Area
		min	AU*min	µmol/L		AU	%
1	PSER	2.42	0.0009	6.1659	BMB	0.003	0.18
2	TAU	3.393	0.0519	434.576	BM	0.232	10.01
3	PETN	3.987	0.001	12.3396	MB	0.003	0.19
4	Urea	5.12	0.0215	5686.04	BMB	0.087	4.15
5	THR	13.547	0.0103	71.1446	BM ^	0.054	1.98
6	SER	13.953	0.0077	52.8053	MB^	0.025	1.48
7	ASN	15.293	0.0017	16.0325	BM *^	0.004	0.33
8	GLU	16.467	0.0032	20.7483	M *^	0.009	0.61
9	GLN	17.127	0.0527	379.566	MB*^	0.089	10.17
11	GLY	26.533	0.0292	202.361	M *^	0.057	5.63
12	ALA	27.867	0.0154	100.875	M ^	0.032	2.96
13	CIT	28.573	0.0051	32.3032	MB^	0.011	0.98
14	ABU	29.66	0.0007	4.5952	BMB^	0.002	0.13
15	VAL	30.947	0.023	153.249	BMB^	0.045	4.43
16	MET	35.6	0.0034	26.6945	BMB^	0.006	0.65
17	ILE	37.867	0.0113	75.2908	BM ^	0.018	2.18
18	LEU	39.427	0.0182	128.366	MB^	0.026	3.52
19	TYR	43.267	0.0056	37.2278	BMB	0.006	1.09
20	PHE	45.893	0.0066	45.032	BMB	0.007	1.28
21	TRYP	72.16	0.0044	52.1278	BMB*	0.002	0.85
23	ORN	88.527	0.0038	19.4056	BMB*	0.004	0.73
24	LYS	91.76	0.0156	96.3449	BMB	0.014	3
25	HIS	96.133	0.0059	38.8787	BMB	0.015	1.13
26	3-MHIS	97.66	0.001	6.9913	BMB	0.003	0.2
27	AGPA	106.547	0.1688	361.917	BMB*	0.526	32.54
28	ARG	120.427	0.0106	73.9087	BMB	0.014	2.04
Total:			0.4794	8134.99		1.293	92.44

## Sheet: 82
No.	Peakname	Ret.Time	Area	Amount	Type	Height	Rel.Area
		min	AU*min	µmol/L		AU	%
1	PSER	2.373	0.0017	14.1369	BMB	0.005	0.41
2	TAU	3.387	0.0385	410.099	BM *	0.168	9.46
3	PETN	3.88	0.0009	13.962	MB*	0.002	0.21
4	Urea	5.113	0.014	4702.01	BMB	0.057	3.44
5	THR	13.353	0.0133	116.933	BM ^	0.06	3.26
6	SER	13.853	0.0062	54.1309	MB^	0.018	1.52
7	ASN	15.247	0.001	11.4676	BMB^	0.002	0.24
8	GLU	16.413	0.0021	17.3975	BM *^	0.006	0.52
9	GLN	17.107	0.0415	379.654	MB*^	0.068	10.19
11	GLY	26.573	0.0055	48.2874	MB*^	0.011	1.35
12	ALA	27.88	0.0119	98.9878	BM ^	0.025	2.91
13	CIT	28.607	0.0037	29.9806	M *^	0.008	0.91
14	ABU	29.707	0.0017	14.844	MB*^	0.004	0.42
15	VAL	30.993	0.0181	153.225	BMB^	0.036	4.44
16	MET	35.667	0.0035	35.1481	BMB	0.006	0.86
17	ILE	37.9	0.0115	97.1147	BM ^	0.018	2.82
18	LEU	39.447	0.0163	145.381	MB^	0.023	3.99
19	TYR	43.24	0.0021	17.2946	BMB*	0.003	0.51
20	PHE	45.94	0.0044	37.6835	BMB	0.005	1.07
21	TRYP	71.853	0.003	44.1758	BMB*	0.002	0.73
24	ORN	88.647	0.0093	60.6683	BMB^	0.009	2.28
25	LYS	91.787	0.0255	200.442	BMB	0.023	6.26
26	HIS	96.133	0.0037	31.2322	BMB	0.01	0.91
27	3-MHIS	97.62	0.0005	4.5967	BMB	0.001	0.13
28	AGPA	106.553	0.1327	284.677	BMB*	0.409	32.6
29	ARG	120.48	0.0056	49.4848	BMB	0.008	1.37
Total:			0.3779	7073.02		0.988	92.8

[truncated: 3 more sheets: 83, 115, 116]
